# Supplementary material
Source: publisher figshare collection journal article supplement (https://tandf.figshare.com/articles/dataset/_/7110419)

Plasma Concentration of Soluble Adhesion Molecules (ng/mL)

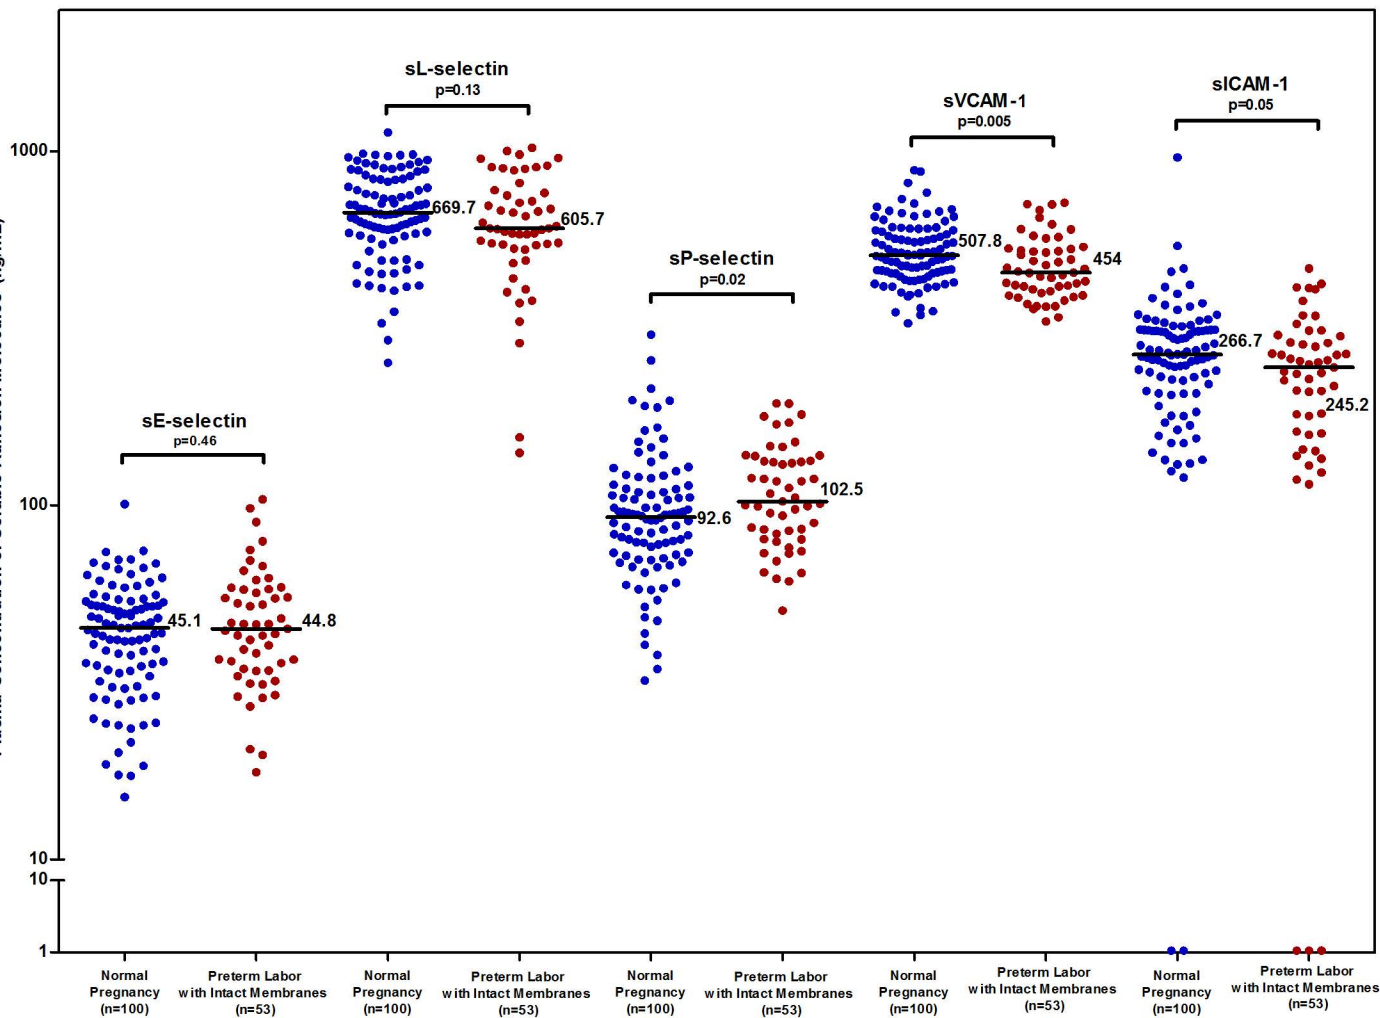

Supplement: Supplementary file 1 [file 3]

Plasma Concentration of Soluble Adhesion Molecules (ng/mL)

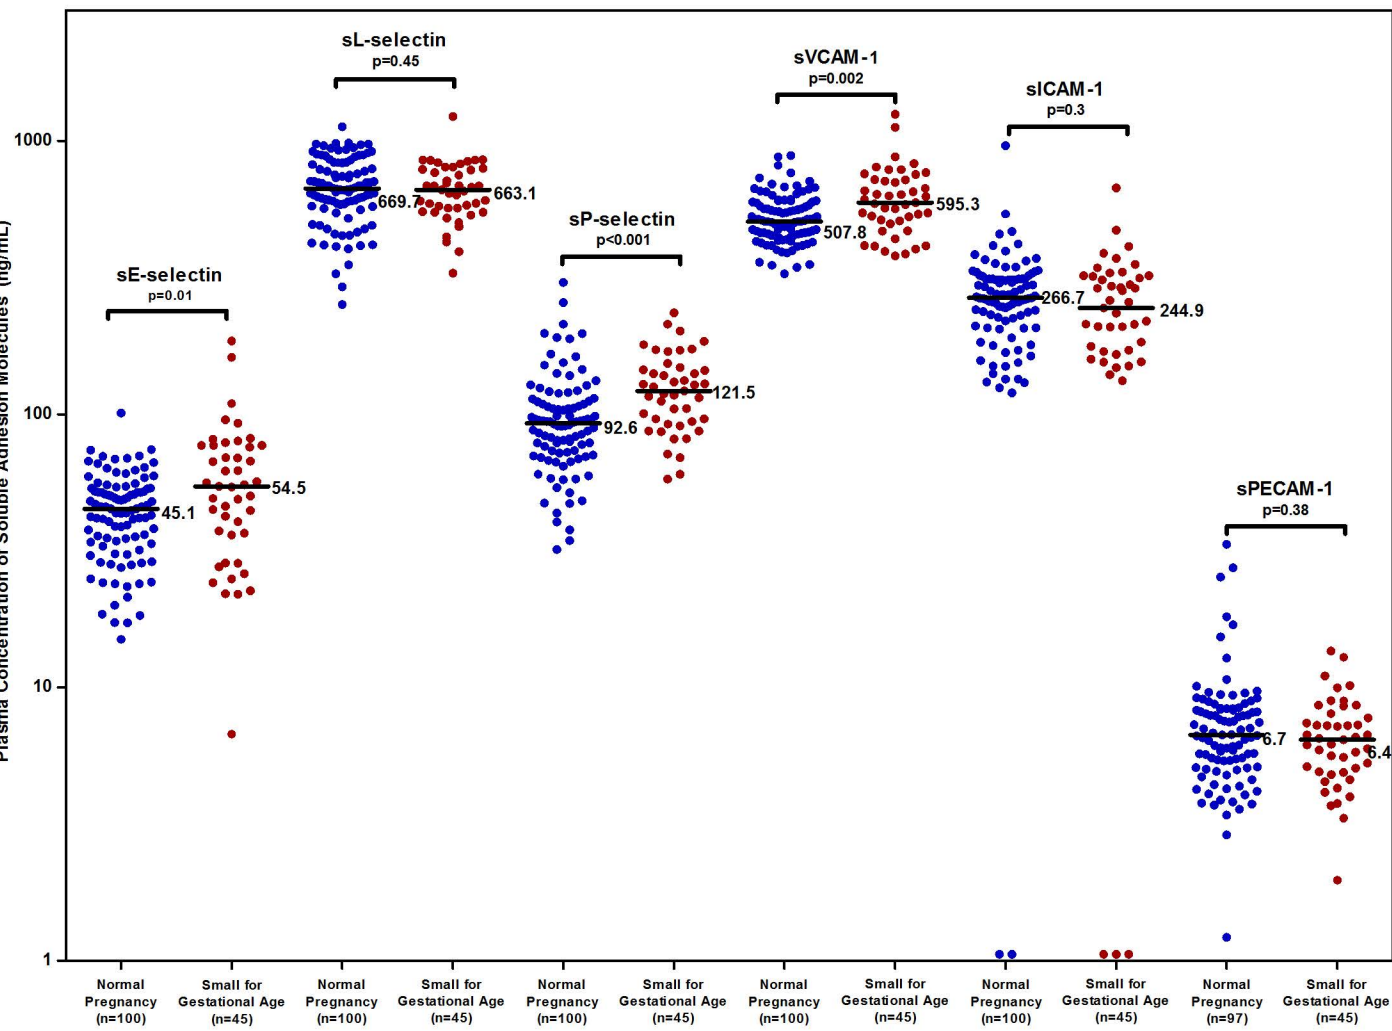

Supplement: Supplementary file 2 [file 3]

Plasma Concentration of Soluble Adhesion Molecules (ng/mL)

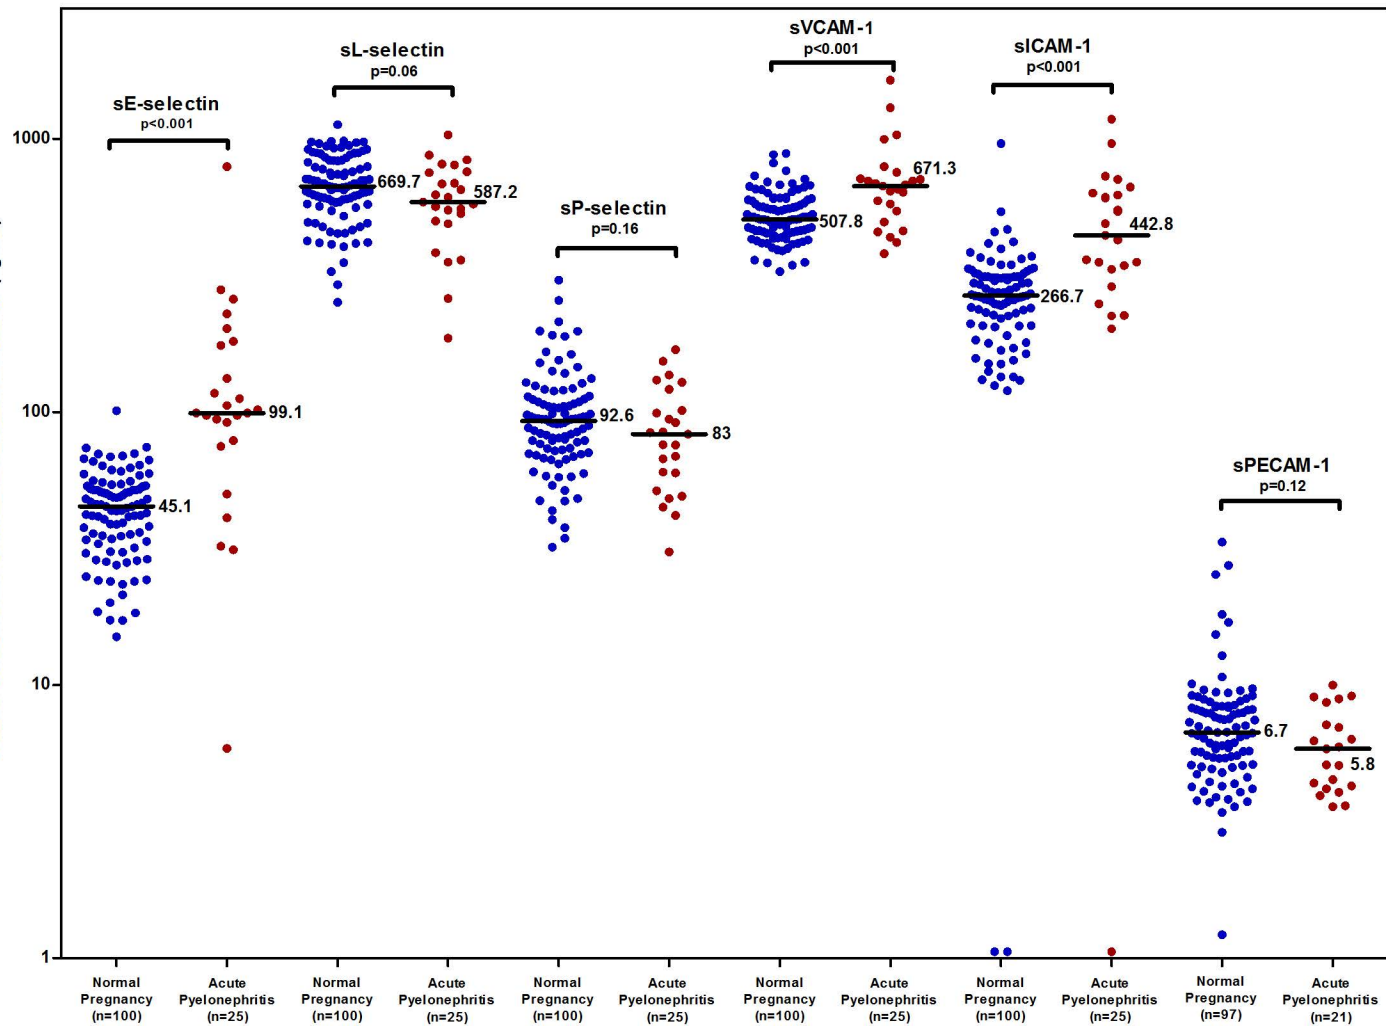

Supplement: Supplementary file 3 [file 3]

Plasma Concentration of Soluble Adhesion Molecules (ng/mL)

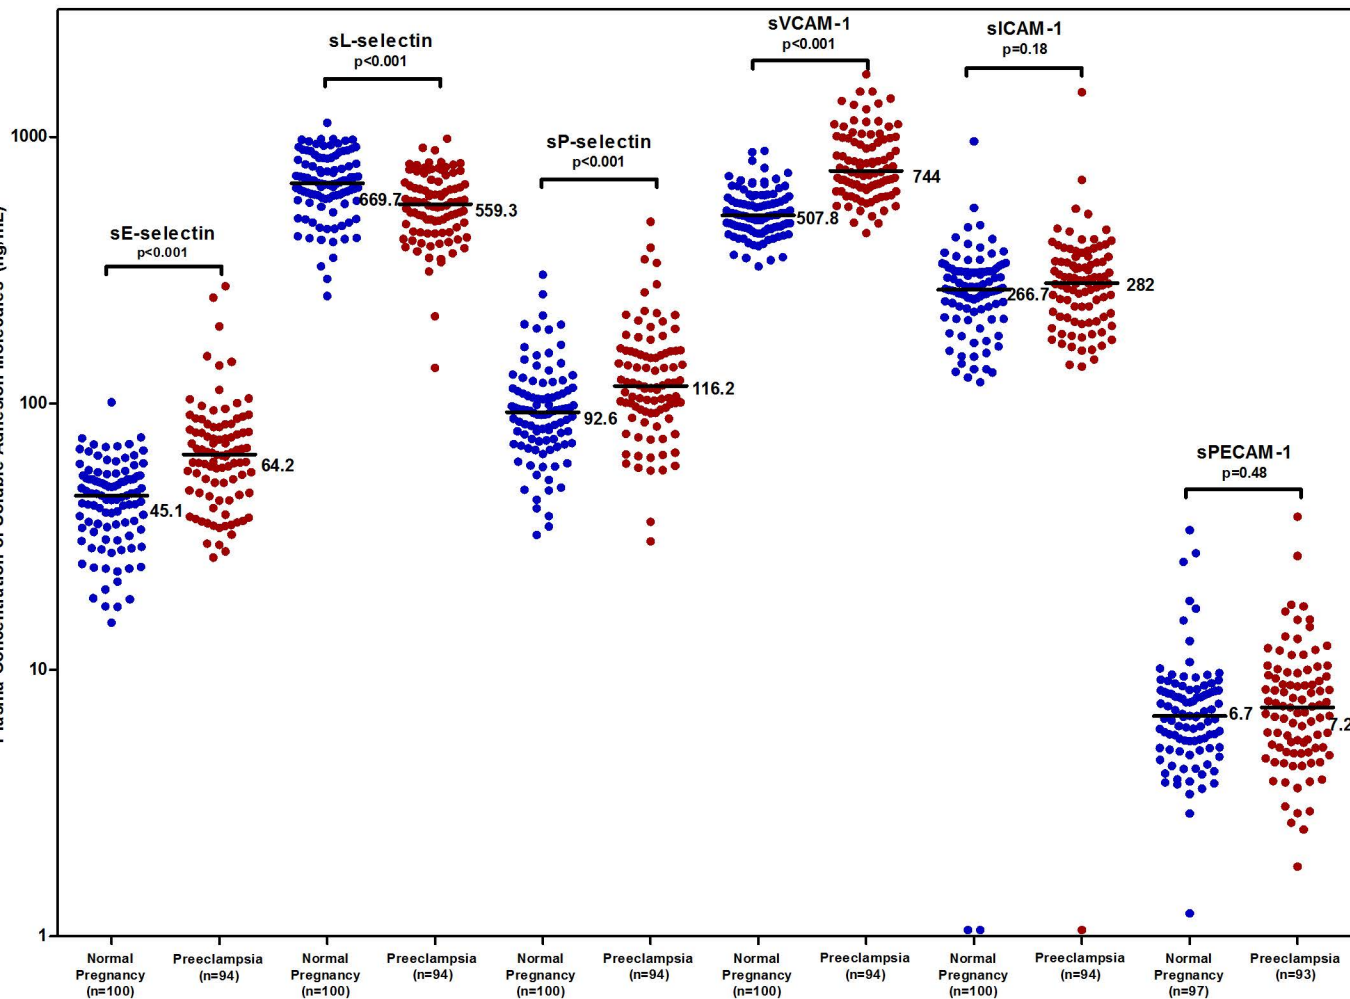

Supplement: Supplementary file 4 [file 3]

Plasma Concentration of Soluble Adhesion Molecules (ng/mL)

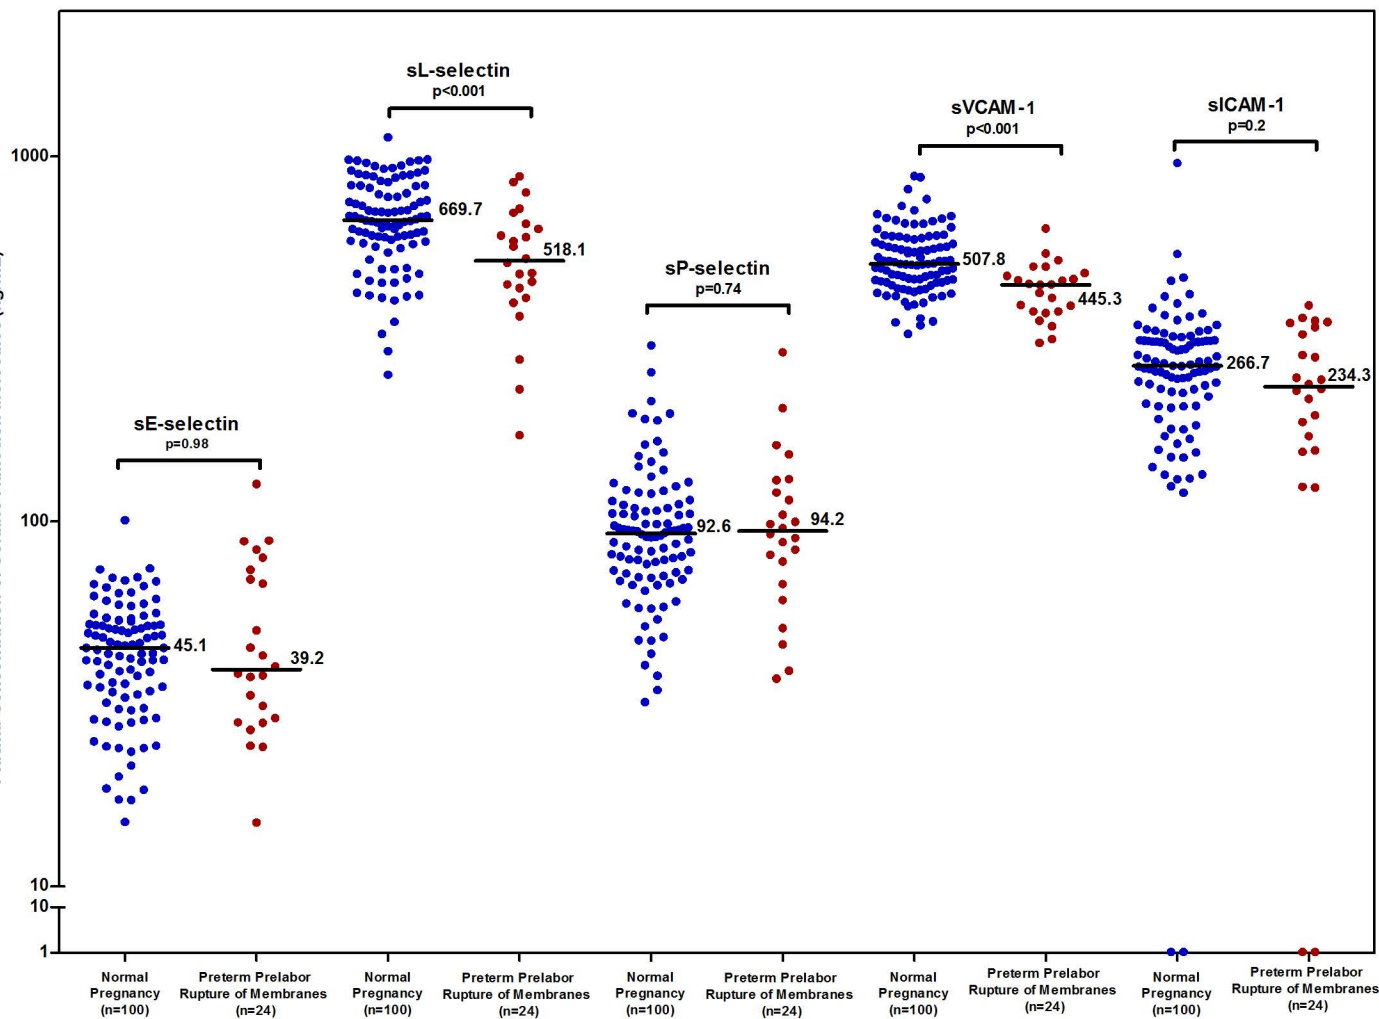

Supplement: Supplementary file 5 [file 3]

**A**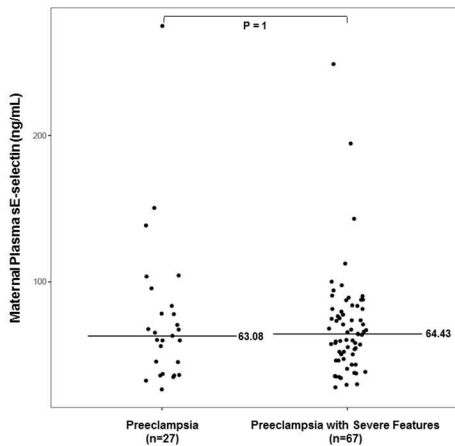**B**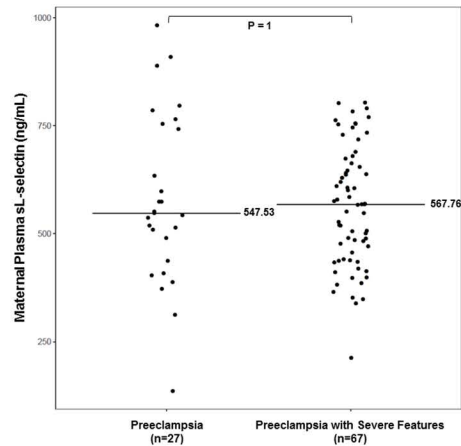**C**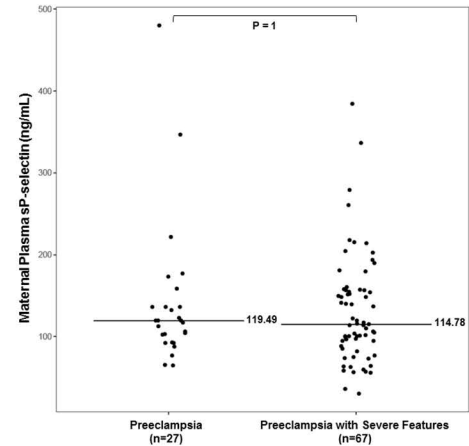**D**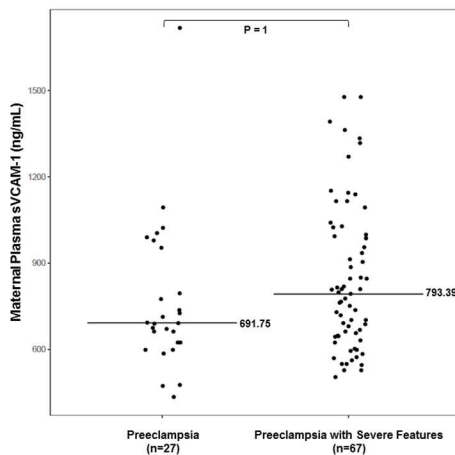**E**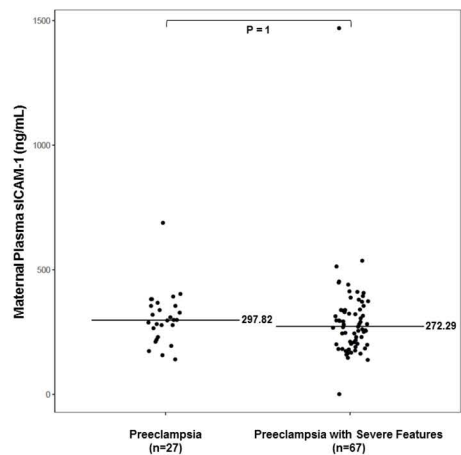**F**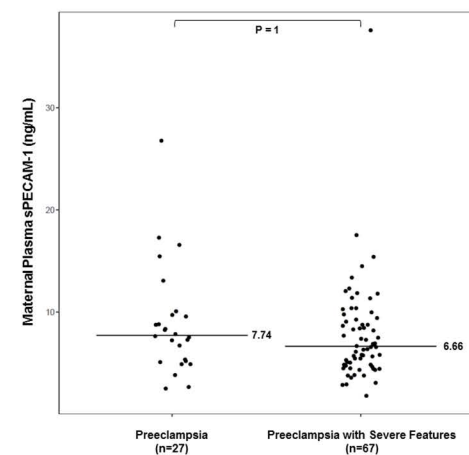

Supplement: Supplementary file 6 [file 3]
